# Supplementary material
Source: PubMed Central journal article supplement (PMC3993401)
Supplement: IAI.01508-13_zii999090581so1.pdf [file IAI.01508-13_zii999090581so1.pdf]

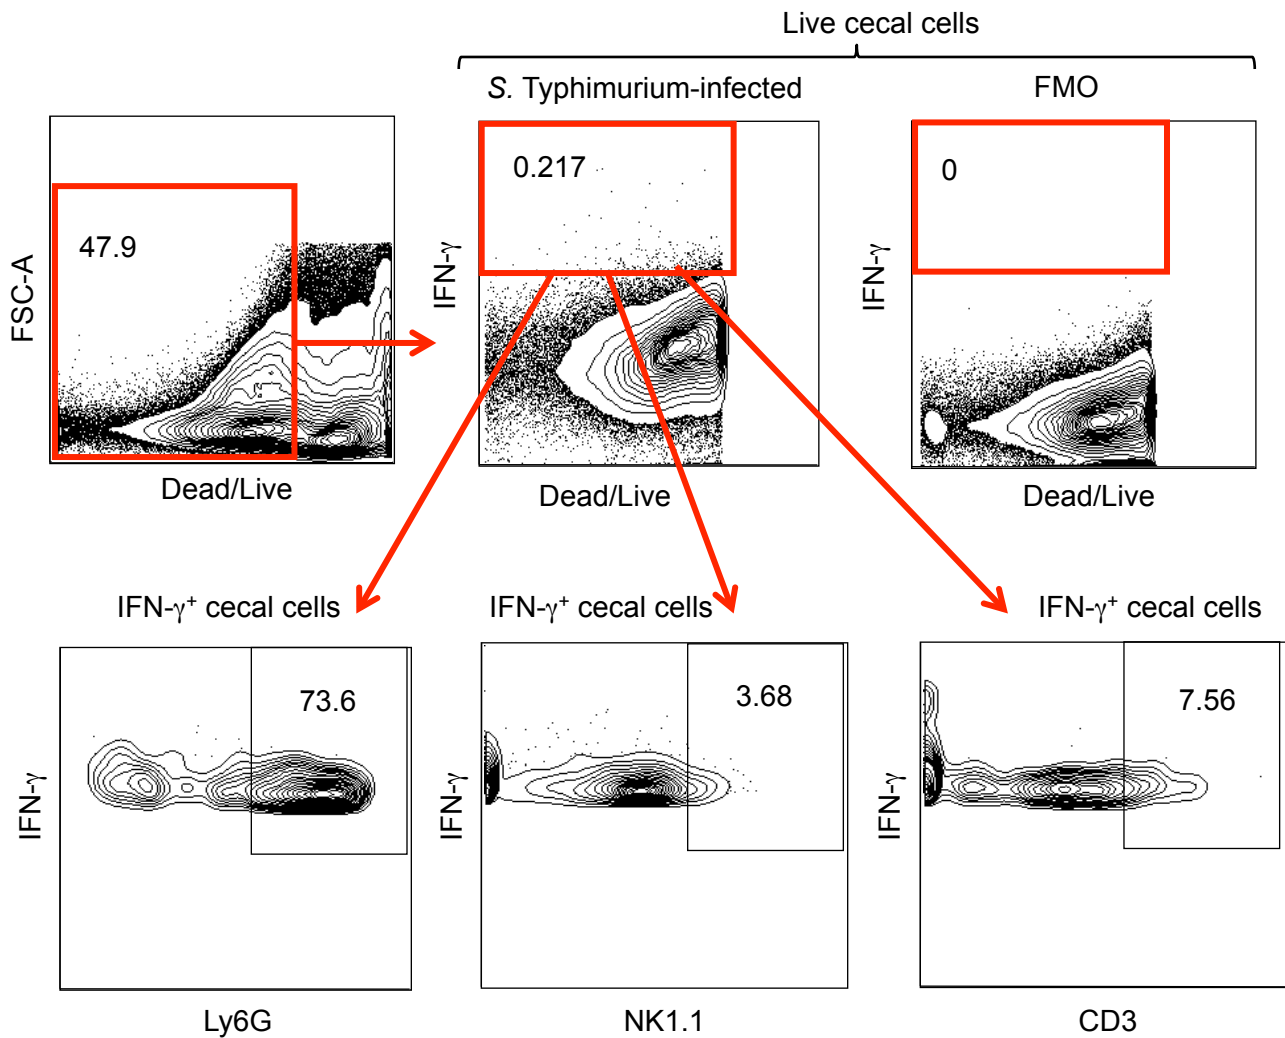

**Figure S1:** The majority of IFN- $\gamma$  positive cells in the cecal mucosa are neutrophils.

Flow cytometric analysis of cecal cell suspensions generated two days after inoculation of streptomycin-pretreated mice (C57BL/6) with *S. Typhimurium* or sterile medium (mock infection). Live cecal cells were gated (top left panel) and subsequently a gate for the detection of IFN- $\gamma$  positive cells was set using a fluorescence-minus-one (FMO) control (top middle and top left panels). IFN- $\gamma$  positive live cecal cells were then analyzed for expression of the neutrophil marker LY6G (bottom left panel), the NK cell marker NK1.1 (bottom middle panel) or the T cell marker CD3 (bottom right panel).

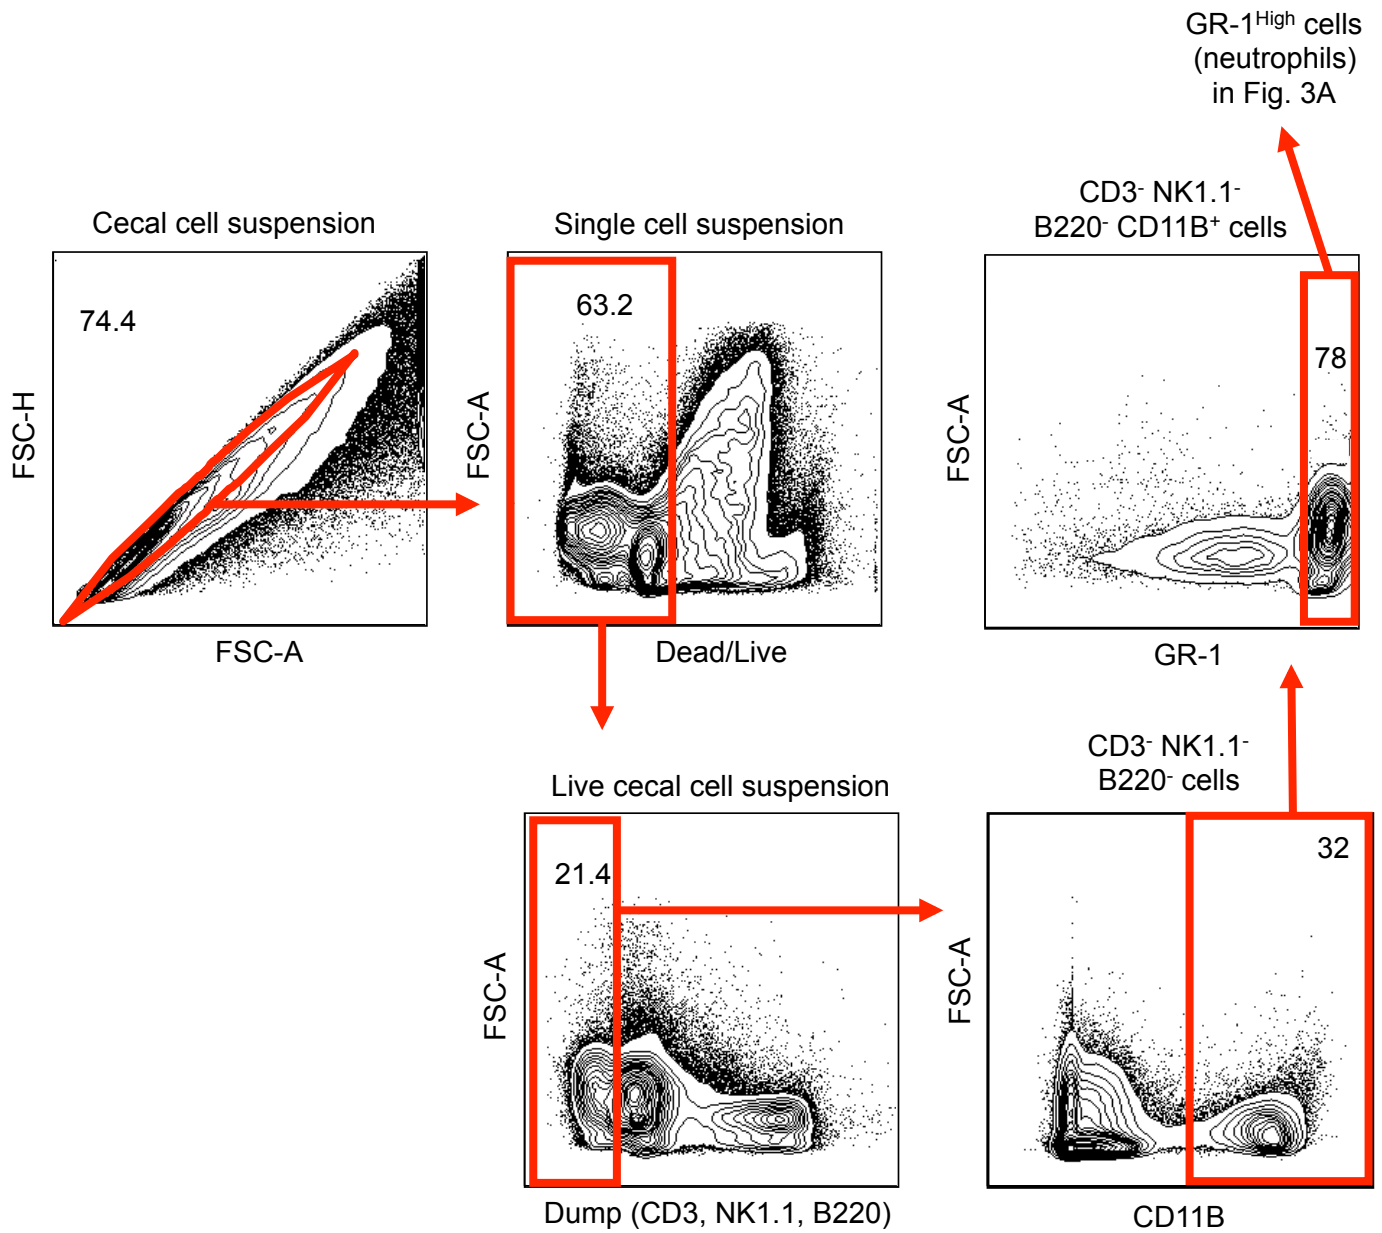

**Figure S2:** Gating strategy for assessing neutrophil depletion using an anti-LY6G antibody.

After doublet elimination (top left panel), live cecal cells were gated (top middle panel) and CD3<sup>+</sup> NK1.1<sup>+</sup> B220<sup>+</sup> cells eliminated using a dump channel (bottom left panel). CD3<sup>-</sup> NK1.1<sup>-</sup> B220<sup>-</sup> cells were analyzed for expression of CD11B (bottom right panel) and CD3<sup>-</sup> NK1.1<sup>-</sup> B220<sup>-</sup> CD11B<sup>+</sup> cells were analyzed for expression of GR-1 (Top right panel). All gates were set using FMO controls.
